# Supplementary material for: Age-Related Changes in Epilepsy Characteristics and Response to Antiepileptic Treatment in Autism Spectrum Disorders
Source: MDPI journal article supplement (doi:10.3390/jpm13071167), 2023-07-21
Supplement: s1 [file s1]

**Table S1.** Patient Characteristics.

|                              | All Seizures(N=570) |      | Generalized (N=315) |      | Focal (N=253) |      | Absence (N=266) |      | LKS (N=24) |      | Atypical LKS (N=26) |      | LGS (N=15) |       | IS (N=29) |       |
|------------------------------|---------------------|------|---------------------|------|---------------|------|-----------------|------|------------|------|---------------------|------|------------|-------|-----------|-------|
|                              | Average             | SEM  | Average             | SEM  | Average       | SEM  | Average         | SEM  | Average    | SEM  | Average             | SEM  | Average    | SEM   | Average   | SEM   |
| Age of seizure onset         | 5.88                | 0.28 | 7.04                | 0.43 | 4.86          | 0.32 | 4.59            | 0.29 | 4.25       | 0.92 | 3.42                | 0.62 | 2.13       | 0.74  | 0.48      | 0.24  |
|                              | N                   | %    | N                   | %    | N             | %    | N               | %    | N          | %    | N                   | %    | N          | %     | N         | %     |
| Sex (Male)                   | 444                 | 77.9 | 253                 | 80.3 | 186           | 73.5 | 205             | 77.1 | 19         | 79.2 | 22                  | 84.6 | 11         | 73.3  | 24        | 82.8  |
| Diagnosis                    | N                   | %    | N                   | %    | N             | %    | N               | %    | N          | %    | N                   | %    | N          | %     | N         | %     |
| Autism Disorder              | 409                 | 71.8 | 240                 | 76.2 | 180           | 71.1 | 203             | 76.3 | 19         | 79.2 | 19                  | 73.1 | 13         | 86.7  | 19        | 65.5  |
| PDD-NOS                      | 130                 | 22.8 | 68                  | 21.6 | 60            | 23.7 | 56              | 21.1 | 5          | 20.8 | 7                   | 26.9 | 2          | 13.3  | 8         | 27.6  |
| Asperger's                   | 59                  | 10.4 | 27                  | 8.6  | 29            | 11.5 | 22              | 8.2  | 1          | 4.2  | 1                   | 3.8  | 0          | 0     | 2         | 6.9   |
| Comorbidity                  | N                   | %    | N                   | %    | N             | %    | N               | %    | N          | %    | N                   | %    | N          | %     | N         | %     |
| Prematurity                  | 92                  | 16.1 | 38                  | 12.1 | 46            | 18.2 | 48              | 18.0 | 3          | 12.5 | 4                   | 15.4 | 2          | 13.3  | 7         | 24.1  |
| Cerebral palsy               | 29                  | 5.1  | 17                  | 5.4  | 15            | 5.9  | 13              | 4.9  | 1          | 4.2  | 2                   | 7.7  | 0          | 0     | 4         | 13.8  |
| Sensory integration disorder | 275                 | 48.2 | 146                 | 46.3 | 122           | 48.2 | 141             | 53.0 | 15         | 62.5 | 17                  | 65.4 | 8          | 53.3  | 15        | 51.7  |
| ADHD                         | 159                 | 27.9 | 79                  | 25.1 | 76            | 30.0 | 88              | 33.1 | 7          | 29.2 | 6                   | 23.1 | 2          | 13.3  | 5         | 17.2  |
| Hypotonia                    | 143                 | 25.1 | 77                  | 24.4 | 63            | 24.9 | 72              | 27.1 | 4          | 16.7 | 13                  | 50.0 | 6          | 40.0  | 9         | 31.0  |
| Mitochondrial disease        | 62                  | 10.9 | 23                  | 7.3  | 32            | 12.6 | 29              | 10.9 | 4          | 16.7 | 7                   | 26.9 | 2          | 13.3  | 3         | 10.3  |
| Enteritis                    | 101                 | 17.7 | 50                  | 15.9 | 51            | 20.2 | 53              | 19.9 | 3          | 12.5 | 12                  | 46.2 | 3          | 20.0  | 5         | 17.2  |
| LNH                          | 20                  | 3.5  | 12                  | 3.8  | 12            | 4.7  | 10              | 3.8  | 0          | 0    | 6                   | 23.1 | 0          | 0     | 0         | 0     |
| Dysbiosis                    | 90                  | 15.8 | 40                  | 12.7 | 39            | 15.4 | 56              | 21.1 | 3          | 12.5 | 9                   | 34.6 | 1          | 6.7   | 4         | 13.8  |
| GERD                         | 130                 | 22.8 | 65                  | 20.6 | 61            | 24.1 | 58              | 21.8 | 3          | 12.5 | 11                  | 42.3 | 6          | 40.0  | 8         | 27.6  |
| Constipation                 | 245                 | 43.0 | 125                 | 39.7 | 104           | 41.1 | 127             | 47.7 | 9          | 37.5 | 9                   | 34.6 | 7          | 46.7  | 13        | 44.8  |
| Growth failure               | 83                  | 14.6 | 35                  | 11.1 | 45            | 17.8 | 40              | 15.0 | 3          | 12.5 | 6                   | 23.1 | 5          | 33.3  | 4         | 13.8  |
| Accelerated growth           | 51                  | 8.9  | 23                  | 7.3  | 17            | 6.7  | 34              | 12.8 | 2          | 8.3  | 1                   | 3.8  | 0          | 0     | 0         | 0     |
| Microcephaly                 | 24                  | 4.2  | 9                   | 2.9  | 12            | 4.7  | 15              | 5.6  | 0          | 0    | 2                   | 7.7  | 2          | 13.3  | 3         | 10.3  |
| Macrocephaly                 | 66                  | 11.6 | 30                  | 9.5  | 35            | 13.8 | 29              | 10.9 | 2          | 8.3  | 4                   | 15.4 | 2          | 13.3  | 1         | 3.4   |
| Genetic syndromes            | 40                  | 7.0  | 24                  | 7.6  | 21            | 8.3  | 20              | 7.5  | 1          | 4.2  | 1                   | 3.8  | 5          | 33.3  | 5         | 17.2  |
| Mental retardation           | 151                 | 26.4 | 94                  | 29.8 | 86            | 34.0 | 73              | 27.4 | 6          | 20.8 | 1                   | 3.8  | 10         | 66.7  | 13        | 44.8  |
| Insomnia                     | 186                 | 32.6 | 100                 | 31.7 | 84            | 33.2 | 103             | 38.7 | 8          | 33.3 | 10                  | 38.5 | 6          | 40.0  | 11        | 37.9  |
| Disturbed sleep maintenance  | 267                 | 46.8 | 140                 | 44.4 | 118           | 46.6 | 137             | 51.5 | 11         | 45.8 | 16                  | 61.5 | 8          | 53.3  | 14        | 48.3  |
| Sleep apnea                  | 54                  | 9.5  | 35                  | 11.1 | 29            | 11.5 | 25              | 9.4  | 1          | 4.2  | 4                   | 15.4 | 4          | 26.7  | 3         | 10.3  |
| Restless leg                 | 38                  | 6.7  | 13                  | 4.1  | 15            | 5.9  | 25              | 9.4  | 6          | 25.0 | 3                   | 11.5 | 1          | 6.7   | 3         | 10.3  |
| Renal diseases               | 11                  | 1.9  | 3                   | 1.0  | 6             | 2.4  | 7               | 2.6  | 0          | 0    | 1                   | 3.8  | 0          | 0     | 2         | 6.9   |
| Cardiovascular diseases      | 9                   | 1.6  | 6                   | 1.9  | 4             | 1.6  | 5               | 1.9  | 0          | 0    | 0                   | 0    | 2          | 13.3  | 0         | 0     |
| Hematological diseases       | 5                   | 0.9  | 0                   | 0    | 4             | 1.6  | 1               | 0.4  | 0          | 0    | 1                   | 3.8  | 0          | 0     | 0         | 0     |
| Regression characteristics   | N                   | %    | N                   | %    | N             | %    | N               | %    | N          | %    | N                   | %    | N          | %     | N         | %     |
| NDR                          | 158                 | 27.7 | 88                  | 27.9 | 67            | 26.5 | 66              | 24.8 | 7          | 29.2 | 15                  | 57.7 | 4          | 26.7  | 7         | 24.1  |
| Seizure preceding            | 57                  | 10.0 | 32                  | 10.2 | 27            | 10.7 | 23              | 8.6  | 5          | 20.8 | 2                   | 7.7  | 2          | 13.3  | 5         | 17.2  |
| Fever preceding              | 47                  | 8.2  | 29                  | 9.2  | 19            | 7.5  | 24              | 9.0  | 2          | 8.3  | 4                   | 15.4 | 0          | 0     | 0         | 0     |
| Viral illness preceding      | 32                  | 5.6  | 19                  | 6.0  | 14            | 5.5  | 16              | 6.0  | 0          | 0    | 2                   | 7.7  | 2          | 13.3  | 1         | 3.4   |
| Head trauma preceding        | 6                   | 1.1  | 3                   | 1.0  | 4             | 1.6  | 3               | 1.1  | 1          | 4.2  | 0                   | 0    | 0          | 0     | 0         | 0     |
|                              | Average             | SEM  | Average             | SEM  | Average       | SEM  | Average         | SEM  | Average    | SEM  | Average             | SEM  | Average    | SEM   | Average   | SEM   |
| Age of initial regression    | 2.13                | 0.16 | 2.14                | 0.24 | 2.29          | 0.28 | 2.22            | 0.29 | 1.93       | 0.25 | 1.55                | 0.16 | 2.13       | 0.76  | 0.99      | 0.25  |
| Duration (weeks)             | 29.76               | 3.48 | 29.25               | 4.17 | 28.30         | 4.34 | 25.62           | 3.55 | 28.56      | 9.36 | 31.54               | 6.88 | 25.50      | 10.89 | 26.90     | 12.59 |
| Number of regressions        | 4.28                | 0.74 | 3.88                | 0.64 | 4.55          | 0.86 | 4.70            | 0.86 | 2.33       | 0.47 | 3.14                | 0.42 | 5.50       | 2.73  | 2.57      | 0.57  |
| Seizure refractoriness       | N                   | %    | N                   | %    | N             | %    | N               | %    | N          | %    | N                   | %    | N          | %     | N         | %     |
| Seizure resolved             | 471                 | 82.6 | 269                 | 85.4 | 227           | 89.7 | 223             | 83.8 | 21         | 87.5 | 19                  | 73.1 | 14         | 93.3  | 22        | 75.9  |
|                              | Average             | SEM  | Average             | SEM  | Average       | SEM  | Average         | SEM  | Average    | SEM  | Average             | SEM  | Average    | SEM   | Average   | SEM   |
| Duration in years            | 3.68                | 0.44 | 4.01                | 0.66 | 4.63          | 1.10 | 5.16            | 0.84 | 3.60       | 1.07 | 7.13                | 2.08 | 2.50       | -     | 7.09      | 2.14  |
| Frequency (best) (weeks)     | 1.50                | 0.13 | 1.03                | 0.14 | 1.55          | 0.19 | 2.05            | 0.22 | 3.06       | 0.91 | 2.19                | 0.67 | 4.61       | 1.35  | 1.91      | 0.66  |

|                           |      |      |      |      |      |      |      |      |      |      |      |      |       |   |      |      |
|---------------------------|------|------|------|------|------|------|------|------|------|------|------|------|-------|---|------|------|
| Frequency (worst) (weeks) | 5.70 | 0.20 | 4.96 | 0.26 | 6.51 | 0.28 | 6.96 | 0.28 | 8.50 | 0.69 | 6.80 | 0.91 | 10.50 | 0 | 9.42 | 0.53 |
|---------------------------|------|------|------|------|------|------|------|------|------|------|------|------|-------|---|------|------|
